# Supplementary material for: Neurospora crassa transcriptomics reveals oxidative stress and plasma membrane homeostasis biology genes as key targets in response to chitosan
Source: Royal Society of Chemistry journal article supplement (doi:10.1039/c5mb00649j), 2015-12-01
Supplement: c5mb00649j1.zip [file c5mb00649j1.zip]

Fig. S2

## Up-regulated functions

4h

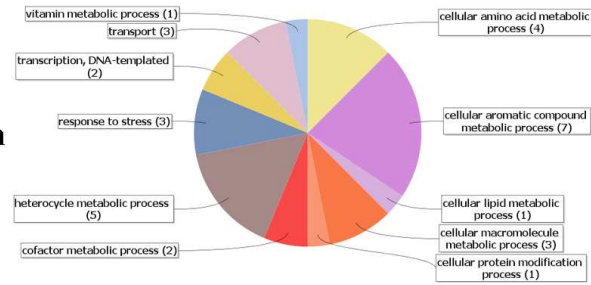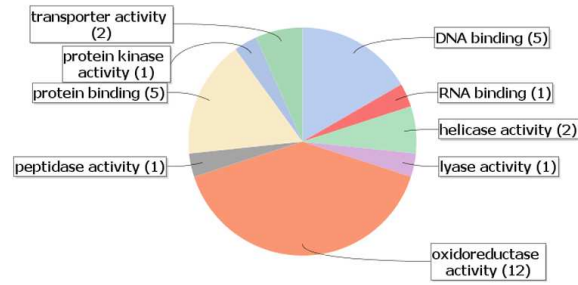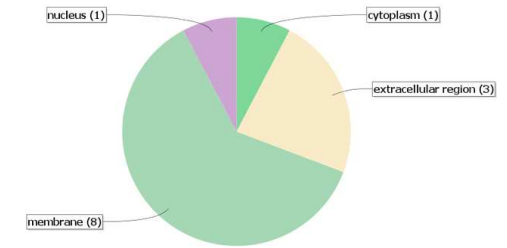

8h

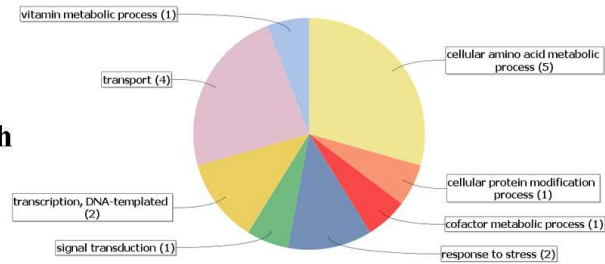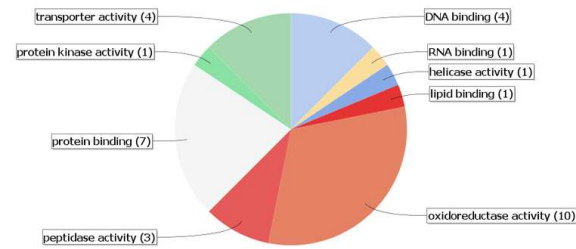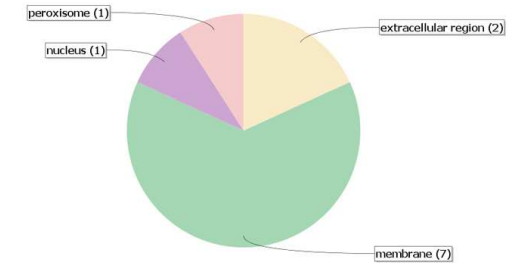

16h

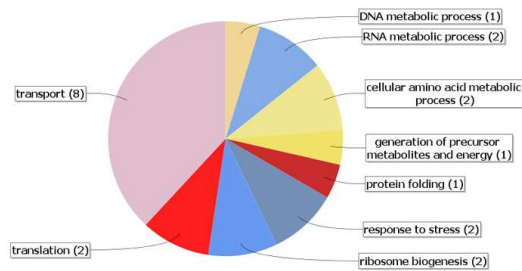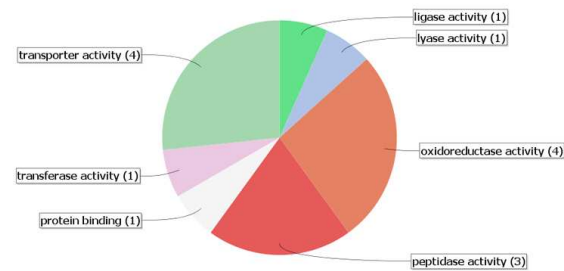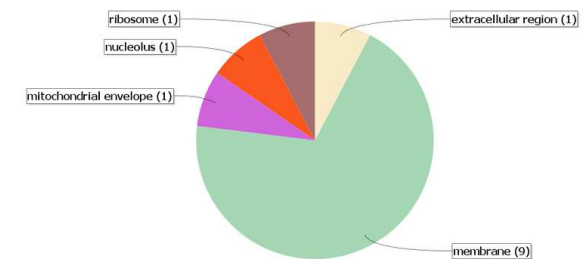

Biological processes

Molecular functions

Cellular components
