# Supplementary figures and images for: Neurospora crassa transcriptomics reveals oxidative stress and plasma membrane homeostasis biology genes as key targets in response to chitosan
Source: Royal Society of Chemistry journal article supplement (doi:10.1039/c5mb00649j), 2015-12-01

Fig S1

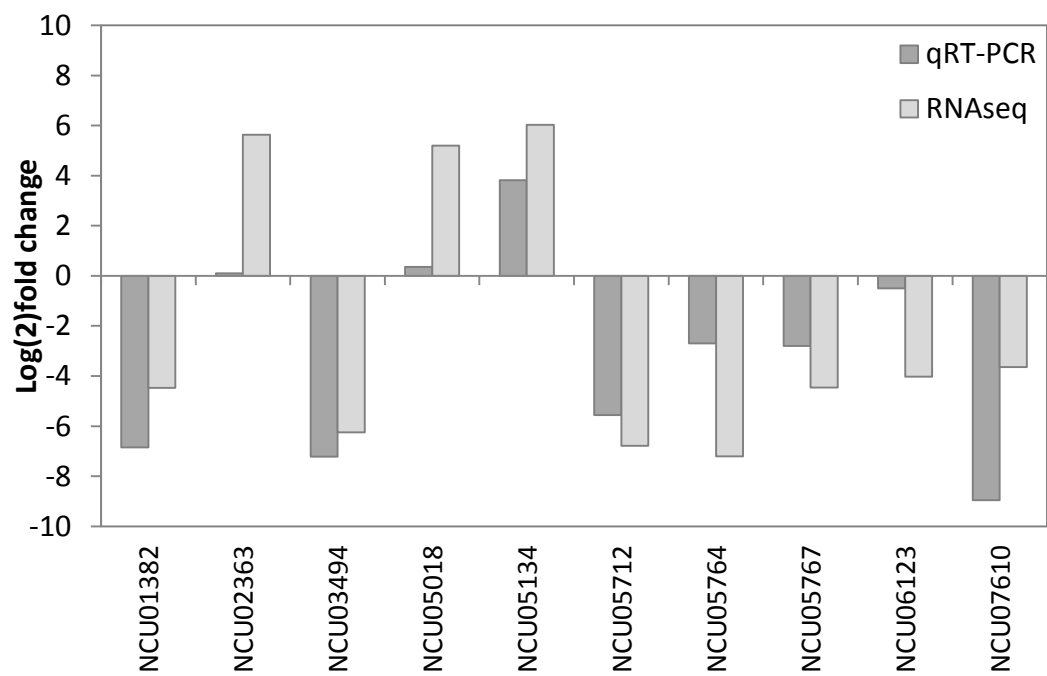

Supplement: c5mb00649j1.zip [file c5mb00649j1.zip]

Clusters of genes which did not fit the model (b+ab) in the ASCA gene analysis

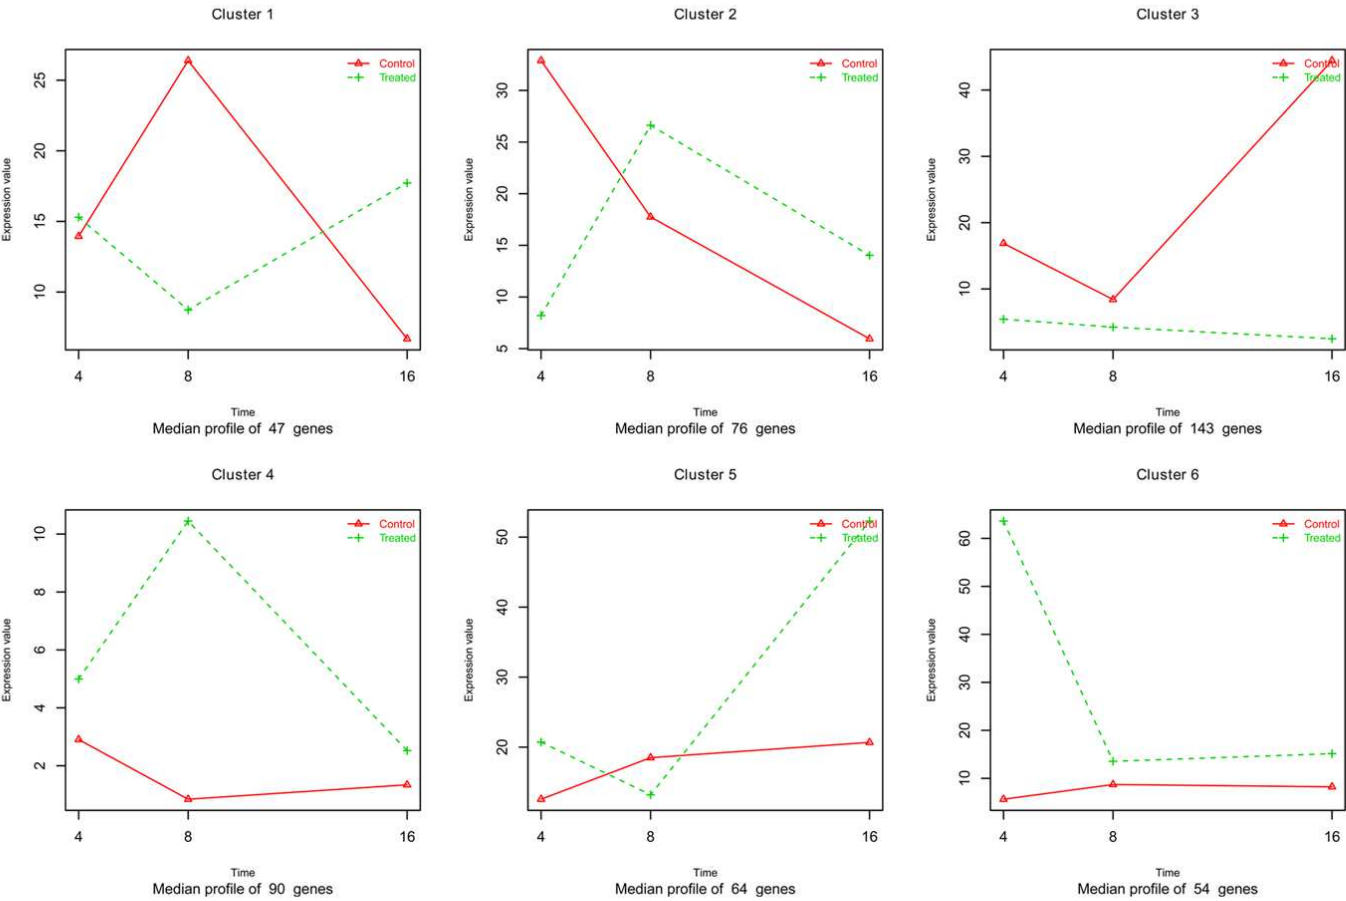

Fig. S6

Supplement: c5mb00649j1.zip [file c5mb00649j1.zip]

ASCA gene model (b+ab)

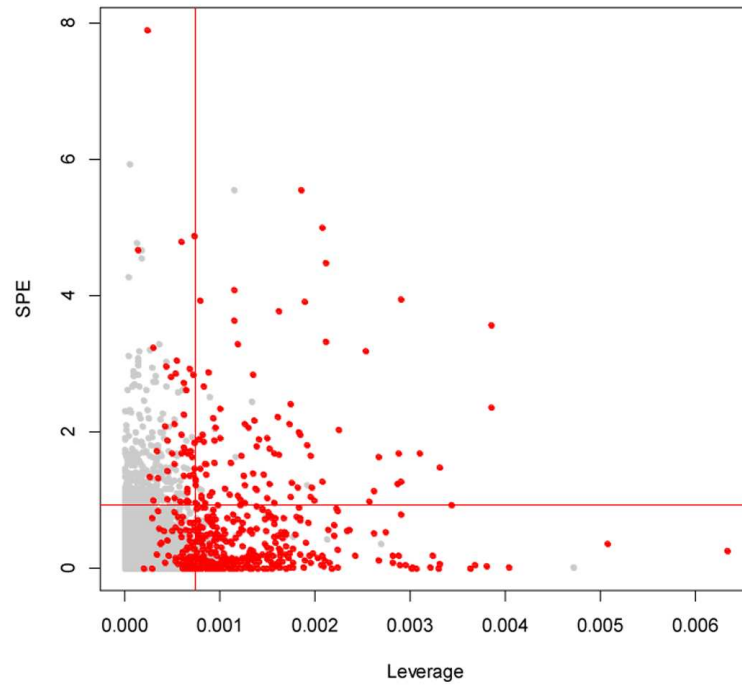

Fig. S5

Supplement: c5mb00649j1.zip [file c5mb00649j1.zip]

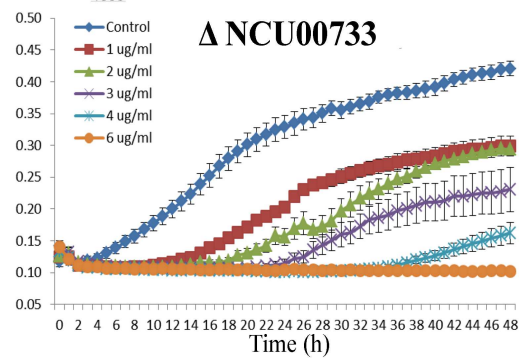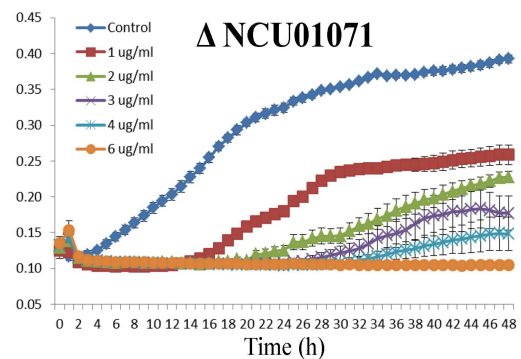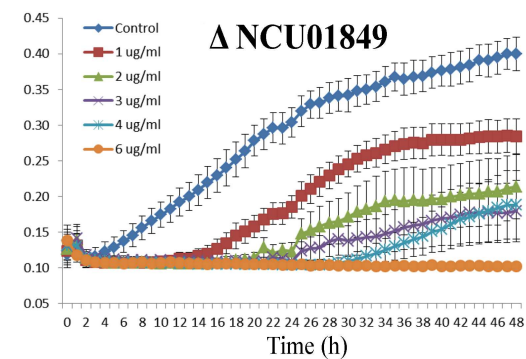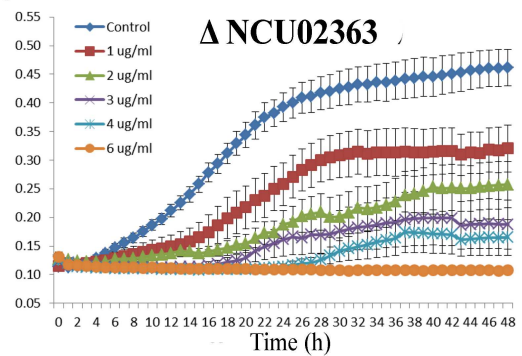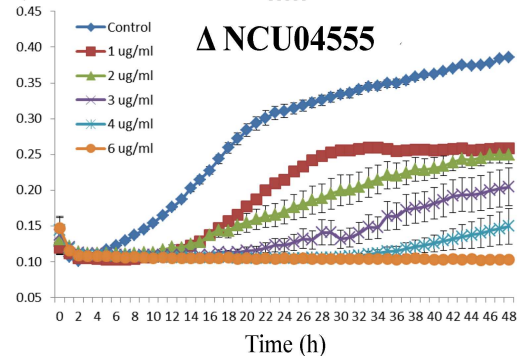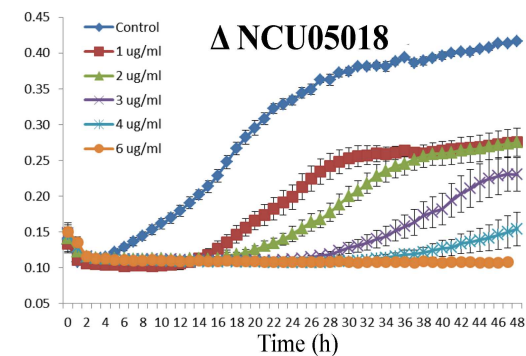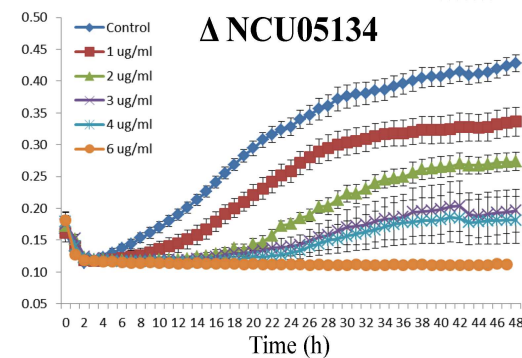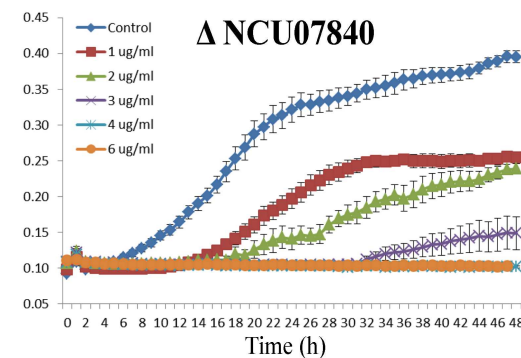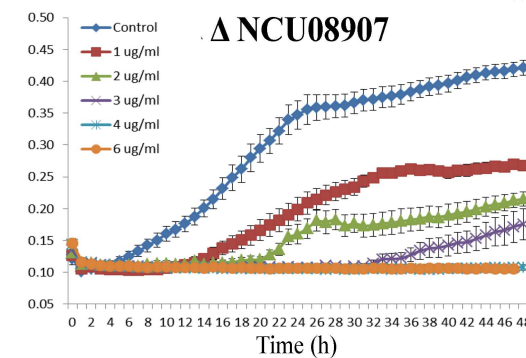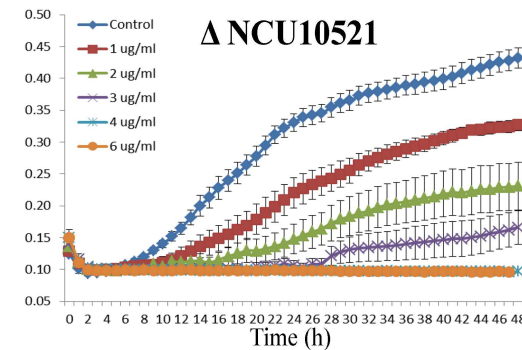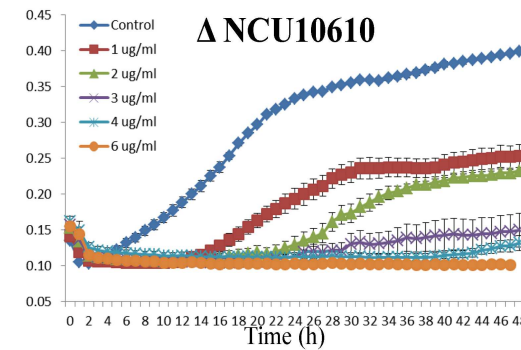

Fig. S7

Supplement: c5mb00649j1.zip [file c5mb00649j1.zip]

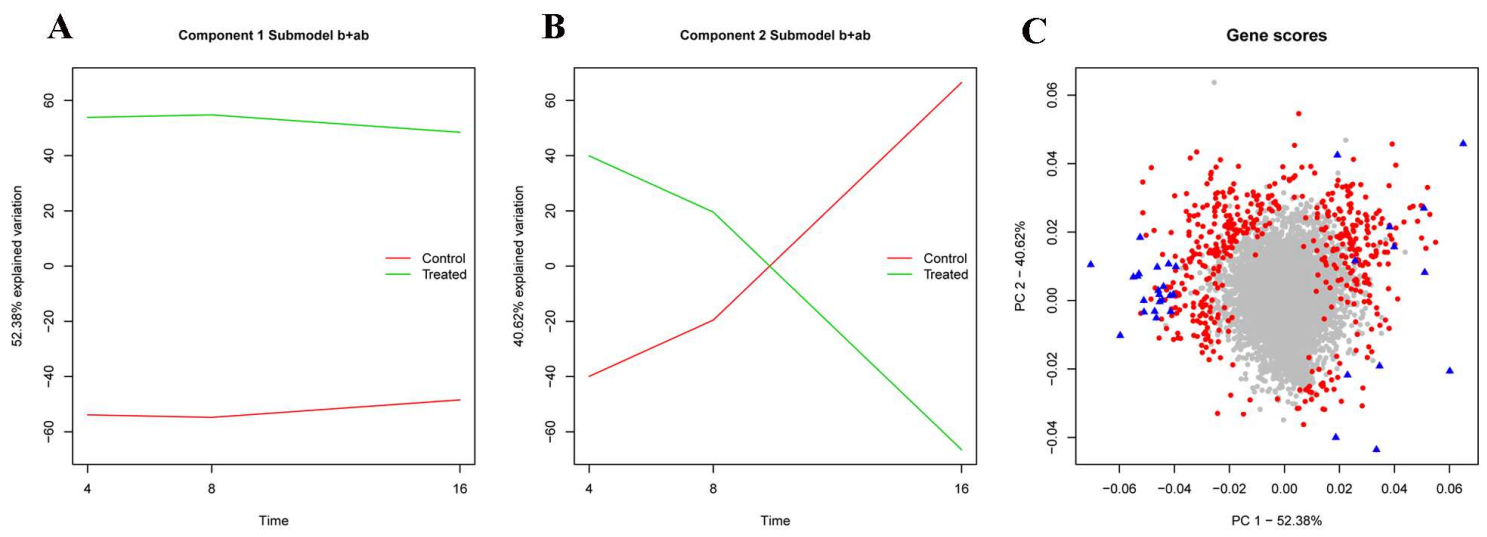

Fig S4

Supplement: c5mb00649j1.zip [file c5mb00649j1.zip]

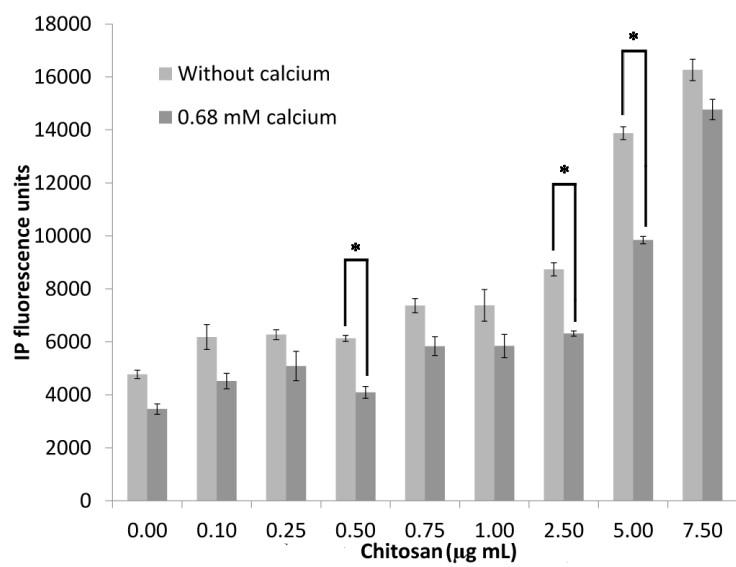

Fig. S8

Supplement: c5mb00649j1.zip [file c5mb00649j1.zip]
